# Supplementary material for: Prognostic and biologic significance of long non-coding RNA profiling in younger adults with cytogenetically normal acute myeloid leukemia
Source: PubMed Central journal article supplement — Haematologica. 2017 May 4;102(8):1391–400. doi: 10.3324/haematol.2017.166215 (PMC5541873; doi:10.3324/haematol.2017.166215), 2017-08
Supplement: 2017_166215-Disclosures_and_Contributions.pdf [file 2017_166215-Disclosures_and_Contributions.pdf]

Haematologica  
HAEMATOL/2017/166215  
Version 3

Prognostic and biologic significance of long non-coding RNA profiling in younger adults with cytogenetically normal acute myeloid leukemia

Dimitrios Papaioannou, Deedra Nicolet, Stefano Volinia, Krzysztof Mrózek, Pearly Yan, Ralf Bundschuh, Andrew J. Carroll, Jessica Kohlschmidt, William Blum, Bayard L. Powell, Geoffrey L. Uy, Jonathan E. Kolitz, Eunice S. Wang, Ann-Kathrin Eifeld, Shelley J. Orwick, David M. Lucas, Michael A. Caligiuri, Richard M. Stone, John C. Byrd, Ramiro Garzon, and Clara D. Bloomfield

Disclosures: None

Contributions: R.G. and C.D.B contributed equally to this work. D.P., D.N., S.V., R.G. and C.D.B. conceived and designed the study. D.P., D.N., S.V., K.M., R.G. and C.D.B. drafted the manuscript. D.N., S.V. and J.K. performed statistical analyses. J.C.B., R.G. and C.D.B. obtained funding for this study. R.G. and C.D.B. supervised the study. All authors participated in the acquisition, analysis and interpretation of the data and in the critical review of the manuscript.
